# Supplementary material for: A deep eutectic electrolyte of AlCl3–acetamide for rechargeable aluminum-ion batteries
Source: Royal Society of Chemistry journal article supplement (doi:10.1039/d4nj00147h), 2024-01-01
Supplement: d4nj00147h1.pdf [file d4nj00147h1.pdf]

# Supporting information

## A deep eutectic electrolyte of AlCl<sub>3</sub>- acetamide for rechargeable aluminum-ion batteries

Xingyang Bao <sup>a</sup>, Zhenshuai Wang <sup>a</sup>, Dai Zhang <sup>a</sup>, Ruoyu Hong <sup>a\*</sup>, Minglin Li <sup>b\*</sup>, Campion M. Smith<sup>c</sup>,

Jinjia Xu <sup>c\*</sup>

<sup>a</sup> College of Chemical Engineering, Fuzhou University, Fuzhou 350108, China

<sup>b</sup> College of Mechanical Engineering and Automation, Fuzhou University, Fuzhou 350108, China

<sup>c</sup> Department of Chemistry and Biochemistry, University of Missouri-St. Louis, MO 63121, USA

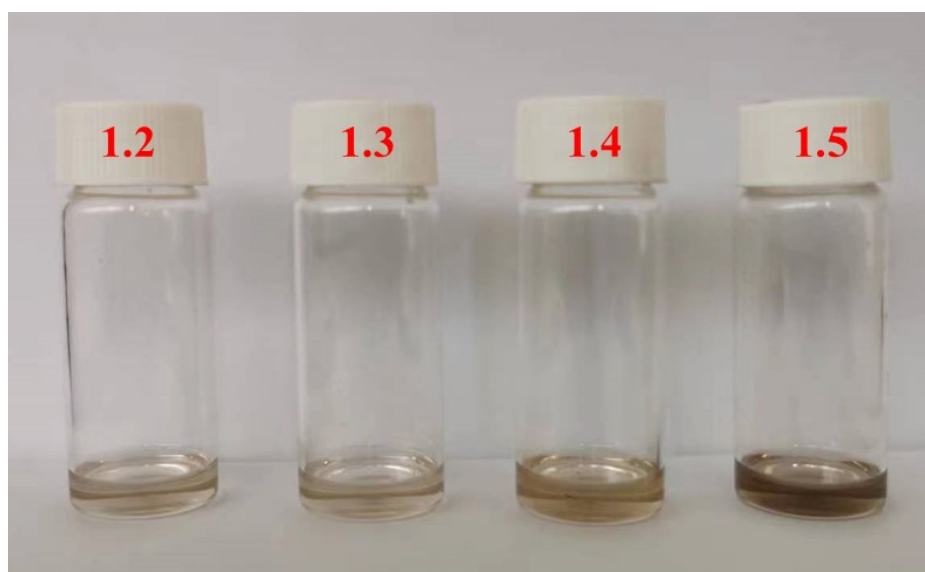

**Figure S1. Physical state of the  $\text{AlCl}_3$ -acetamide DESs with 1.2–1.5 molar composition.**

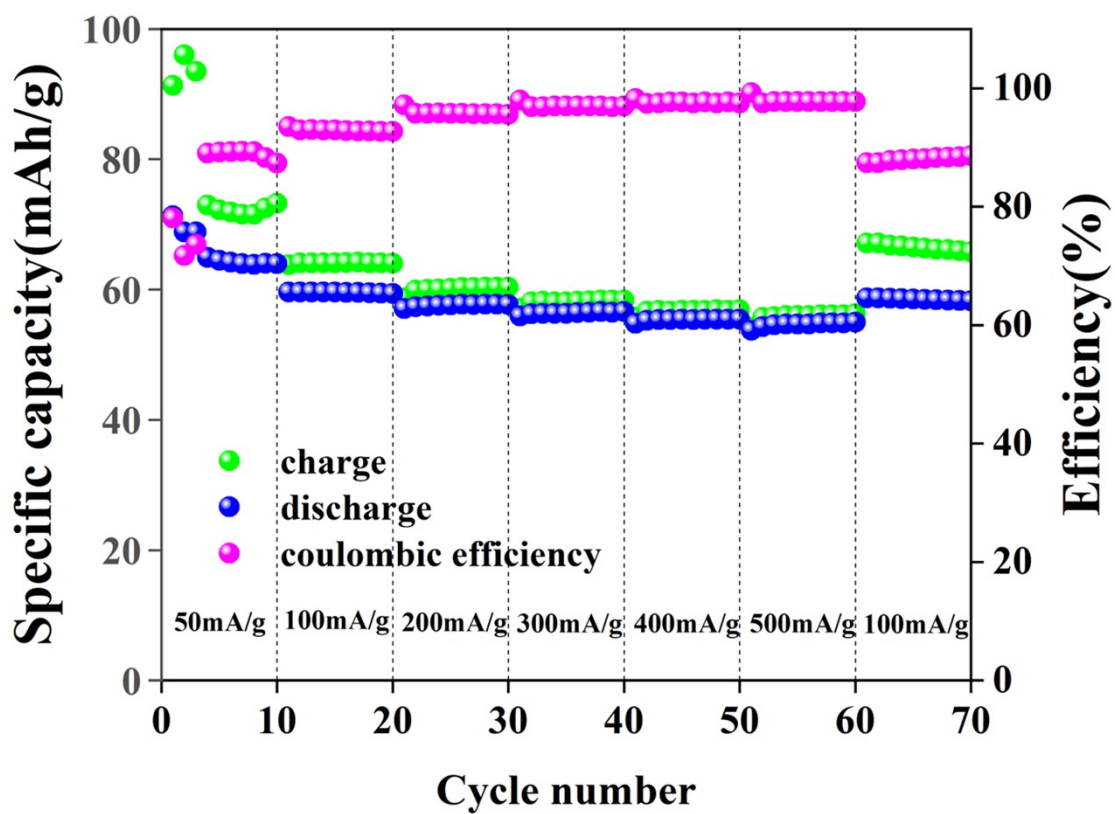

Figure S2. Rate performance image of button battery with  $\text{AlCl}_3$ -[EMIm]Cl-1.3 electrolyte.

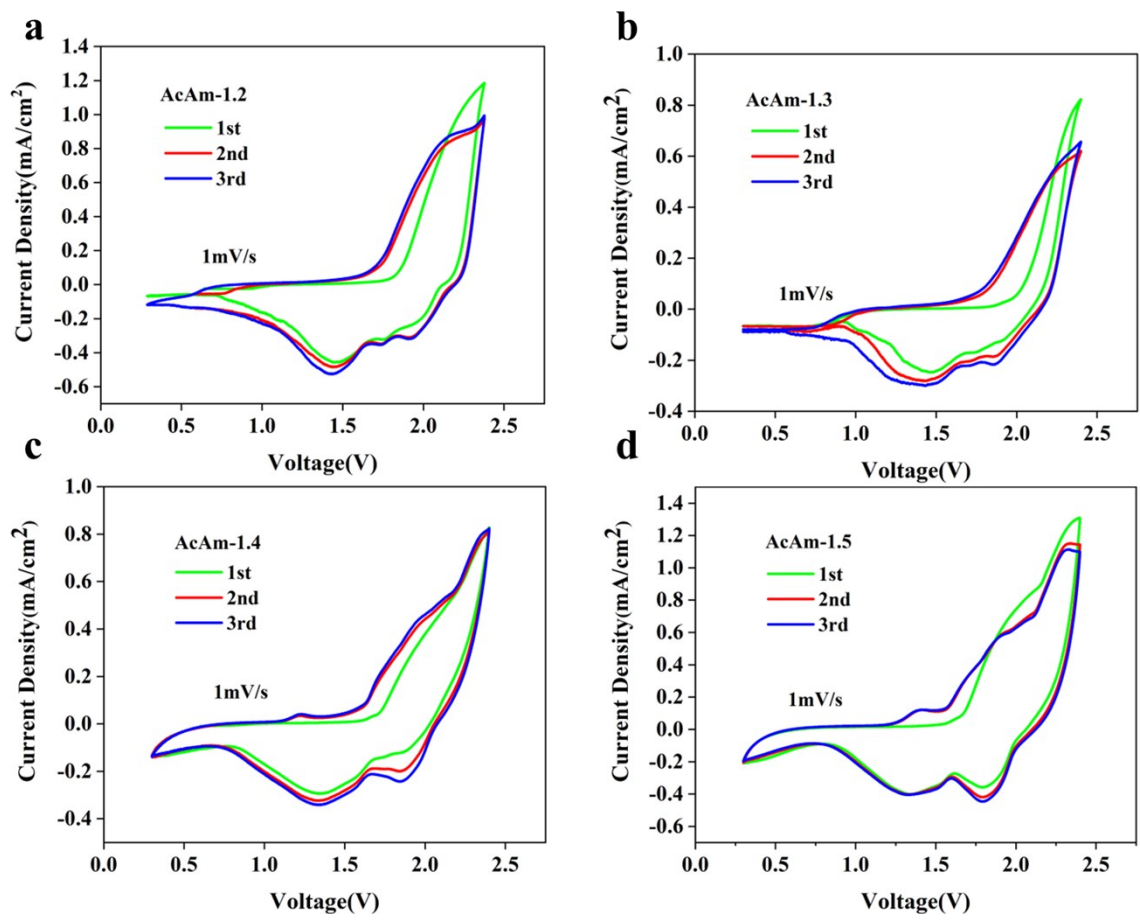

Figure S3. CV curves of button batteries with different molar ratios of electrolytes at 1mV/s scanning speed.

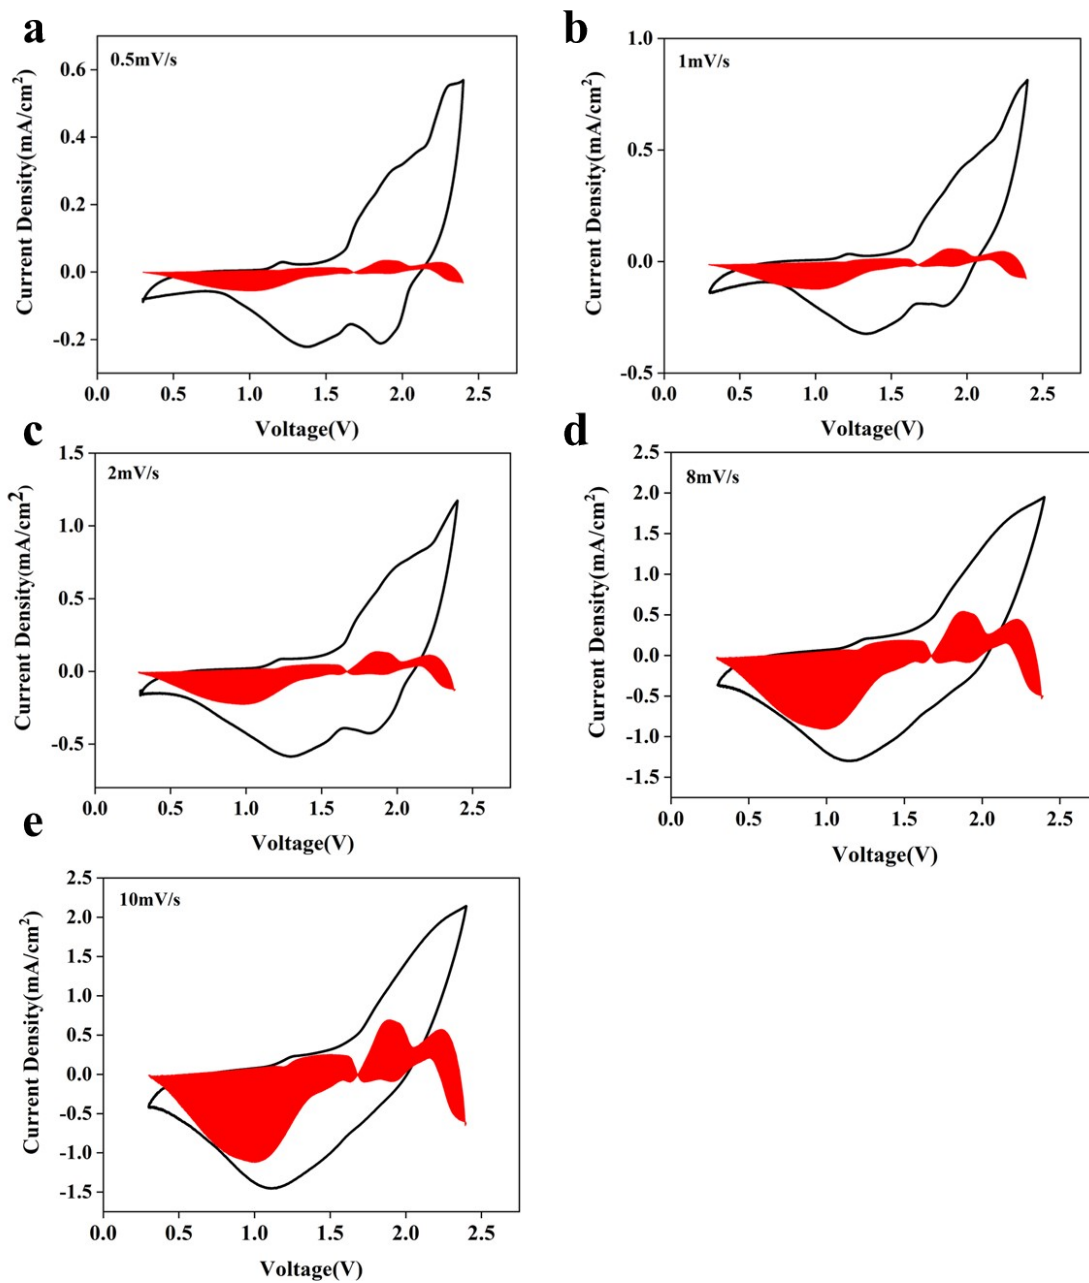

Figure S4. CV curves with capacitive contribution at 0.5 (a), 1 (b), 2 (c), 8 (d), 10 (e) mV/ s.

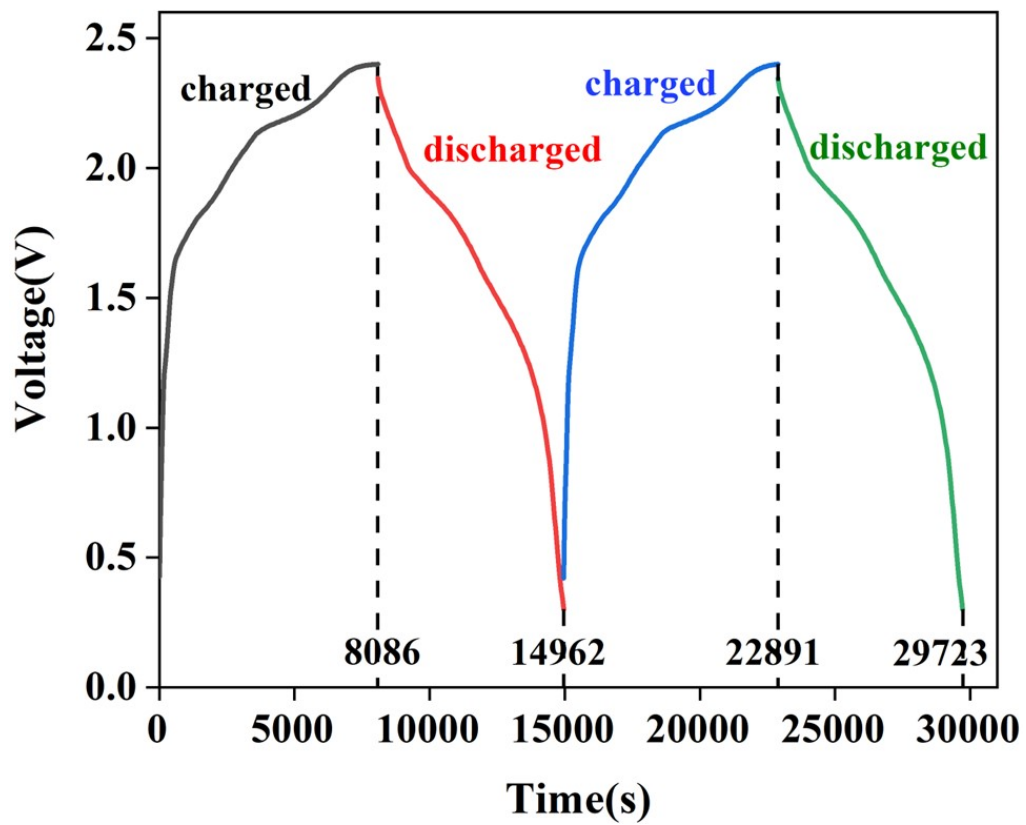

Figure S5. Image of slow charge and slow discharge of battery at low current density (50 mA/g).

**Table S1**

The conductivity data of different molar ratio electrolyte and the simulated charge resistance values of the fitted circuit.

| $\text{AlCl}_3/\text{AcAm}$ molar ratio | Conductivity (ms/cm) | $R_{ct}$ ( $\Omega$ ) | $R_s$ ( $\Omega$ ) | $R_{SEI}$ ( $\Omega$ ) |
|-----------------------------------------|----------------------|-----------------------|--------------------|------------------------|
| 1.2                                     | 0.53                 | 219.1                 | 41.92              | 2725                   |
| 1.3                                     | 0.76                 | 73.77                 | 54.03              | 4005                   |
| 1.4                                     | 0.97                 | 35.34                 | 51.35              | 2032                   |
| 1.5                                     | 0.72                 | 163                   | 49.84              | 1132                   |

**Table S2**

The previously reported reversible capacity of amide batteries at corresponding current densities.

| Electrolytes | Cathode material               | Current density (mA/g)               | Reversible specific capacities (mAh/g) | Ref.      |
|--------------|--------------------------------|--------------------------------------|----------------------------------------|-----------|
| AcAm         | Natural graphite               | 50 and 100                           | 78 and 77                              | [1]       |
| AcAm         | Commercial graphite            | 100 and 500                          | 72.8 and 66                            | [2]       |
| Urea         | Graphite                       | 100                                  | 73                                     | [3]       |
| Urea         | Natural graphite               | 50 and 100                           | 91 and 90                              | [4]       |
| Me-Ur        | Graphite                       | 100,200 and 400                      | 78.6,70.8 and 51.2                     | [5]       |
| Et-Ur        | Graphite                       | 100,200 and 400                      | 77.1,70.6 and 52.3                     | [5]       |
| [EMIm]Cl     | Commercial artificial graphite | 50, 100, 200, 300, 400 and 500       | 64,59,57,56,55,54                      | This work |
| AcAm         | Commercial artificial graphite | 50, 100, 200, 300, 400, 500 and 1000 | 101, 94, 88, 84, 80, 77 and 46         | This work |



## References

1. F. Jach, M. Wassner, M. Bamberg, E. Brendler, G. Frisch, U. Wunderwald and J. Friedrich, *ChemElectroChem*, 2021, **8**, 1988-1992.
2. L. Zhang, Q. Ma, G. Wang, Z. Liu and L. Zhang, *Journal of Electroanalytical Chemistry*, 2021, **888**, 115176.
3. H. Jiao, C. Wang, J. Tu, D. Tian and S. Jiao, *Chemical Communications*, 2017, **53**, 2331-2334.
4. G. A. Elia, K. Hoeppe and R. Hahn, *Batteries & Supercaps*, 2021, **4**, 368-373.
5. M. Angell, G. Zhu, M.-C. Lin, Y. Rong and H. Dai, *Advanced Functional Materials*, 2020, **30**, 1901928.
